# Supplementary material for: The Effect of JAK Inhibitor on the Survival, Anagen Re-Entry, and Hair Follicle Immune Privilege Restoration in Human Dermal Papilla Cells
Source: PubMed Central journal article supplement (PMC7404120; doi:10.3390/ijms21145137), 2020-07-20
Supplement: ijms-21-05137-s001.pdf [file ijms-21-05137-s001.pdf]

# The Effect of JAK Inhibitor on the Survival, Anagen Re-Entry, and Hair Follicle Immune Privilege Restoration in Human Dermal Papilla Cells

Table S1. Primer sequence and PCR conditions.

| Species | Primer Name                    | Forward                   | Reverse                   |
|---------|--------------------------------|---------------------------|---------------------------|
| Human   | <i>caspase-1</i>               | TATCCGTTCCATGGGTGAAG      | TCAAAGCTCGGGTCTTATCC      |
|         | <i>IL-1b</i>                   | GCCAATCTTCATTGCTCAAGT     | ACTTCATCTGTTTAGGGCCA      |
|         | <i>IL-15</i>                   | GCCCAAAGCACCTAACCTAT      | GTTCCCAATACCATGAAGGC      |
|         | <i>IL-18</i>                   | AGCTGAAGATGATGAAAACCT G   | ATAGAGGCCGATTTCCTTGG      |
|         | <i>DKK1</i>                    | TGTGCTAGACACTTCTGGTC      | TTCTCCACAGTAACAACGCT      |
|         | <i>b-catenin</i>               | GTGTTAAGTTATAGTGAATACTGCT | GTGTTCTACACCATTACTCAATTCT |
|         | <i>Lef1</i>                    | AGCTGCCTACATCTGAAACA      | TGGAGACAGTCTGGGTTTTC      |
|         | <i>WNT7a</i>                   | TCTGTAACAAGATCCCAGGC      | CATTGCGGAACTGAAACTGA      |
|         | <i>TGF-<math>\beta</math>2</i> | CTTTCTGCGTCAGTGTGAG       | ACTTTTCCTAGCCCAGTCAC      |
|         | <i>FGF2</i>                    | TCCACCTATAATTGGTCAAAGTGGT | CATCAGTTACCAGTCCCCC       |
|         | <i>FGF7</i>                    | AATTGTGGCAATCAAAGGGG      | CCGTTGTGTGCCATTTAGC       |
|         | <i>IGF1</i>                    | AATCCCTCTTCTGCTTGCTA      | ATTTTCCCCATCGCTTCTGA      |
|         | <i>PDGF</i>                    | TGAAGAGCAAAGTGATTCTTACA   | GGACAGCCTTTCGTAGAAGA      |
|         | <i>VEGF<math>\alpha</math></i> | AGAGGCTTGGGGCAGCCGAG      | ACTCCCGGGCTGGTGAGTCC      |
|         | <i>GAPDH</i>                   | CCCAGCAAGGACACTGAGCAA     | GGCTCCCTAGGCCCTCCTGTTAT   |
